# Supplementary material for: Pigmentation Pathway Evolution after Whole-Genome Duplication in Fish
Source: PubMed Central journal article supplement — Genome Biol Evol. 2009 Nov 25;1:479–93. doi: 10.1093/gbe/evp050 (PMC2839281; doi:10.1093/gbe/evp050), 2009-11-25
Supplement: evp050_2.pdf [file evp050_2.pdf]

## Supplementary Table S1

### Vertebrate Pigmentation Genes

| no.                                                                               | gene            | mouse coat color mutant          | teleost pigment. mutants                 | FSGD <sup>1</sup> | LSGD <sup>2</sup> | References |
|-----------------------------------------------------------------------------------|-----------------|----------------------------------|------------------------------------------|-------------------|-------------------|------------|
| <b>a) melanophore development (FSGD duplicate retention ratio: 22/45 = 48.9%)</b> |                 |                                  |                                          |                   |                   |            |
| 1                                                                                 | <i>Adam17</i>   |                                  |                                          | ■                 |                   | 1          |
| 2                                                                                 | <i>Adamts20</i> | <i>belted</i>                    |                                          |                   |                   | 1          |
| 3                                                                                 | <i>Apc</i>      |                                  |                                          |                   |                   | 1          |
| 4                                                                                 | <i>Creb1</i> *  |                                  |                                          | ■                 | ◇                 | 2          |
| 5                                                                                 | <i>Eda</i>      | <i>Tabby</i>                     |                                          |                   |                   | 1          |
| 6                                                                                 | <i>Edn3</i> *   | <i>lethal spotting</i>           |                                          | ■                 |                   | 1          |
| 7                                                                                 | <i>Ednrb1</i> * | <i>piebald spotting</i>          | <i>rose (ednrb1a)<sup>Dre</sup></i>      | ■                 |                   | 1, 3, 4    |
| 8                                                                                 | <i>Ednrb2</i>   |                                  |                                          |                   |                   | 5          |
| 9                                                                                 | <i>Ece1</i>     |                                  |                                          |                   |                   | 1          |
| 10                                                                                | <i>Egfr</i>     | <i>dark skin 5</i>               |                                          | ■                 |                   | 1, 6       |
| 11                                                                                | <i>En1</i>      |                                  |                                          | ■                 |                   | 1          |
| 12                                                                                | <i>ErbB3</i>    |                                  | <i>picasso (erbb3b)<sup>Dre</sup></i>    | ■                 |                   | 3, 7       |
| 13                                                                                | <i>Fgfr2</i>    |                                  |                                          |                   |                   | 1          |
| 14                                                                                | <i>Foxd3</i> *  |                                  | <i>mother superior<sup>Dre</sup></i>     |                   |                   | 3, 8       |
| 15                                                                                | <i>Frem2</i>    |                                  |                                          | ■                 |                   | 1          |
| 16                                                                                | <i>Fzd4</i>     |                                  |                                          |                   |                   | 1          |
| 17                                                                                | <i>Gnaq</i>     | <i>dark skin 1, dark skin 10</i> |                                          | ■                 | ◇                 | 1          |
| 18                                                                                | <i>Gna11</i>    | <i>dark skin7</i>                |                                          | ■                 |                   | 1          |
| 19                                                                                | <i>Gpc3</i>     |                                  |                                          |                   |                   | 1          |
| 20                                                                                | <i>Gpr161</i>   |                                  |                                          |                   |                   | 1          |
| 21                                                                                | <i>Hdac1</i>    |                                  | <i>colgate (hdac1a)<sup>Dre</sup></i>    | ■                 |                   | 3, 9       |
| 22                                                                                | <i>Ikkkg</i>    |                                  |                                          |                   |                   | 1          |
| 23                                                                                | <i>Itgb1</i>    |                                  |                                          | ■                 | ◇                 | 1          |
| 24                                                                                | <i>Kit</i>      | <i>dominant white-spotting</i>   | <i>sparse (kita)<sup>Dre</sup></i>       | ■                 |                   | 1, 3, 10   |
| 25                                                                                | <i>Kitl</i>     | <i>steel</i>                     |                                          | ■                 |                   | 1, 11      |
| 26                                                                                | <i>Lef1</i>     |                                  |                                          |                   |                   | 1          |
| 27                                                                                | <i>Lmx1a</i>    | <i>dreher</i>                    |                                          |                   |                   | 1          |
| 28                                                                                | <i>Mbtps1</i>   |                                  |                                          |                   |                   | 1          |
| 29                                                                                | <i>Mcoln3</i>   | <i>varitint-waddler</i>          |                                          | ■                 |                   | 1          |
| 30                                                                                | <i>Mitf</i>     | <i>microphthalmia</i>            | <i>nacre (mitfa)<sup>Dre</sup></i>       | ■                 |                   | 1, 3, 12   |
| 31                                                                                | <i>Mreg</i>     | <i>dilute supressor</i>          |                                          |                   |                   | 1          |
| 32                                                                                | <i>Myc</i>      |                                  |                                          | ■                 |                   | 1          |
| 33                                                                                | <i>Pax3</i> *   | <i>splotch</i>                   |                                          | ■                 |                   | 1, 13      |
| 34                                                                                | <i>Scarb2</i>   |                                  | <i>hi1463<sup>Dre</sup></i>              |                   |                   | 3, 14      |
| 35                                                                                | <i>Sfxn1</i>    | <i>flexed tail</i>               |                                          |                   |                   | 1          |
| 36                                                                                | <i>Snai2</i>    |                                  |                                          |                   |                   | 1          |
| 37                                                                                | <i>Sox9</i> *   |                                  | <i>b971 (sox9b)<sup>Dre</sup></i>        | ■                 |                   | 3, 15, 16  |
| 38                                                                                | <i>Sox10</i> *  | <i>Dominant megacolon</i>        | <i>colourless (sox10b)<sup>Dre</sup></i> | ■                 |                   | 1, 3, 17   |
| 39                                                                                | <i>Sox18</i>    | <i>ragged</i>                    | -                                        |                   |                   | 1          |
| 40                                                                                | <i>Tfp2a</i>    | -                                | <i>lockjaw<sup>Dre</sup></i>             |                   |                   | 1, 3, 18   |
| 41                                                                                | <i>Trmp1</i>    | -                                |                                          | ■                 |                   | 19         |

|                                                                                     |                |                                |                                                                     |     |              |
|-------------------------------------------------------------------------------------|----------------|--------------------------------|---------------------------------------------------------------------|-----|--------------|
| 42                                                                                  | <i>Trmp7</i>   | -                              | <i>touchtone</i> <sup>Dre</sup>                                     |     | 3, 19        |
| 43                                                                                  | <i>Wnt1</i>    | -                              | -                                                                   |     | 1            |
| 44                                                                                  | <i>Wnt3a</i>   | -                              | -                                                                   |     | 1            |
| 45                                                                                  | <i>Zic2</i>    | <i>Kumba</i>                   | -                                                                   | ■   | 1            |
| <b>b) components of melanosomes</b> (FSGD duplicate retention ratio: 6/10 = 60.0%)  |                |                                |                                                                     |     |              |
| 46                                                                                  | <i>Dct</i>     | <i>slaty</i>                   | -                                                                   |     | 1            |
| 47                                                                                  | <i>Gpnmb</i>   | <i>iris pigment dispersion</i> | -                                                                   |     | 1            |
| 48                                                                                  | <i>Rab38</i>   | <i>chocolate</i>               | -                                                                   | ■   | 1            |
| 49                                                                                  | <i>Rab32</i>   | -                              | -                                                                   | ■   | 20           |
| 50                                                                                  | <i>Silv</i>    | <i>silver</i>                  | <i>fading vision (silva)</i> <sup>Dre</sup>                         | ■   | 1, 3, 21     |
| 51                                                                                  | <i>Slc24a4</i> | -                              | -                                                                   | ■   | 22           |
| 52                                                                                  | <i>Slc24a5</i> | -                              | <i>golden</i> <sup>Dre</sup>                                        |     | 3, 23        |
| 53                                                                                  | <i>Slc45a2</i> | <i>underwhite</i>              | <i>b</i> <sup>Ola</sup>                                             |     | 1, 24        |
| 54                                                                                  | <i>Tyr</i>     | <i>albino</i>                  | <i>sandy (tyra)</i> <sup>Dre</sup> ; <i>i (tyra)</i> <sup>Ola</sup> | ■   | 1, 3, 25, 26 |
| 55                                                                                  | <i>Tyrp1</i>   | <i>brown</i>                   | -                                                                   | ■   | 1            |
| <b>c) melanosome construction</b> (FSGD duplicate retention ratio: 2/22 = 9.1%)     |                |                                |                                                                     |     |              |
| 56                                                                                  | <i>Ap3b1</i>   | <i>pearl</i>                   |                                                                     | ◇   | 1            |
| 57                                                                                  | <i>Ap3d1</i>   | <i>mocha</i>                   |                                                                     |     | 1            |
| 58                                                                                  | <i>Bloc1s3</i> | <i>reduced pigmentation</i>    |                                                                     |     | 1            |
| 59                                                                                  | <i>Cno</i>     | <i>cappuchino</i>              |                                                                     |     | 1            |
| 60                                                                                  | <i>Dtnbp1</i>  | <i>sandy</i>                   |                                                                     | ■   | 1            |
| 61                                                                                  | <i>Fig4</i>    | <i>pale temor</i>              |                                                                     |     | 1            |
| 62                                                                                  | <i>Gpr143</i>  | <i>Oa1</i>                     |                                                                     |     | 1            |
| 63                                                                                  | <i>Hps1</i>    | <i>pale ear</i>                |                                                                     |     | 1            |
| 64                                                                                  | <i>Hps3</i>    | <i>cocoa</i>                   |                                                                     |     | 1            |
| 65                                                                                  | <i>Hps4</i>    | <i>light ear</i>               |                                                                     |     | 1            |
| 66                                                                                  | <i>Hps5</i>    | <i>Ruby-eye 2</i>              |                                                                     |     | 1            |
| 67                                                                                  | <i>Hps6</i>    | <i>Ruby-eye</i>                |                                                                     |     | 1            |
| 68                                                                                  | <i>Lyst</i>    | <i>beige</i>                   |                                                                     | ◇   | 1            |
| 69                                                                                  | <i>Nsf</i>     |                                | <i>hi2869 (nsfb)</i> <sup>Dre</sup>                                 | ■   | 3            |
| 70                                                                                  | <i>Oca2</i>    | <i>pinkeyed-dilution</i>       | <i>i-3</i> <sup>Ola</sup>                                           |     | 1, 27        |
| 71                                                                                  | <i>Pldn</i>    | <i>pallid</i>                  |                                                                     |     | 1            |
| 72                                                                                  | <i>Rabggta</i> | <i>gunmetal</i>                |                                                                     |     | 1            |
| 73                                                                                  | <i>Txndc5</i>  | <i>muted</i>                   |                                                                     |     | 1            |
| 74                                                                                  | <i>Vps33a</i>  | <i>buff</i>                    |                                                                     |     | 1            |
| 75                                                                                  | <i>Vps11</i>   |                                | <i>pale grey eyes</i> <sup>Ola</sup>                                |     | 28           |
| 76                                                                                  | <i>Vps18*</i>  |                                | <i>vps18</i> <sup>Dre</sup>                                         |     | 3, 29        |
| 77                                                                                  | <i>Vps39*</i>  |                                | <i>lbk/vam6</i> <sup>Dre</sup>                                      |     | 3, 30        |
| <b>d) melanosome transport</b> (retention ratio : 3/4 = 75.0%)                      |                |                                |                                                                     |     |              |
| 78                                                                                  | <i>Mlph</i>    | <i>leaden</i>                  | <i>j120</i> <sup>Dre</sup>                                          | ■   | 1, 3, 31     |
| 79                                                                                  | <i>Myo5a</i>   | <i>dilute</i>                  |                                                                     | ■   | 1            |
| 80                                                                                  | <i>Myo7a</i>   | <i>shaker-1</i>                |                                                                     | ■   | 1            |
| 81                                                                                  | <i>Rab27a</i>  | <i>ashen</i>                   |                                                                     |     | 1            |
| <b>e) regulation of melanogenesis</b> (FSGD duplicate retention ratio: 3/7 = 42.9%) |                |                                |                                                                     |     |              |
| 82                                                                                  | <i>Asip</i>    | <i>nonagouti</i>               |                                                                     |     | 1            |
| 83                                                                                  | <i>Atrn</i>    | <i>mahogany</i>                |                                                                     |     | 1            |
| 4                                                                                   | <i>Creb1*</i>  |                                |                                                                     | ■ ◇ | 2            |
| 84                                                                                  | <i>Drd2</i>    |                                |                                                                     |     | 1            |
| 85                                                                                  | <i>Mc1r</i>    | <i>extension</i>               |                                                                     |     | 1            |
| 86                                                                                  | <i>Mgrn1</i>   | <i>Mahoganoid</i>              |                                                                     | ■   | 1            |
| 87                                                                                  | <i>Pomc</i>    |                                |                                                                     | ■   | 1            |
| <b>f) systemic effects</b> (FSGD duplicate retention ratio: 2/13 = 15.4%)           |                |                                |                                                                     |     |              |
| 88                                                                                  | <i>Atox1</i>   |                                |                                                                     |     | 1            |
| 89                                                                                  | <i>Atp7a</i>   | <i>mottled</i>                 | <i>calamity</i> <sup>Dre</sup>                                      |     | 1, 3         |
| 90                                                                                  | <i>Atp7b</i>   | <i>toxic milk</i>              |                                                                     |     | 1            |

|     |                  |                            |                                          |   |   |       |
|-----|------------------|----------------------------|------------------------------------------|---|---|-------|
| 91  | <i>Atp6ap1</i>   |                            | <i>bleached blond</i> <sup>Dre</sup>     |   | ◇ | 3, 14 |
| 92  | <i>Atp6ap2</i>   |                            | <i>hi3681</i> <sup>Dre</sup>             |   |   | 3     |
| 93  | <i>Atp6v0c</i>   |                            | <i>hi1207 (atp6v0c a)</i> <sup>Dre</sup> | ■ |   | 3, 14 |
| 94  | <i>Atp6v0d1</i>  |                            | <i>hi2188b</i> <sup>Dre</sup>            |   |   | 3     |
| 95  | <i>Atp6v1e1*</i> |                            | <i>hi577a (atp6v1e1a)</i> <sup>Dre</sup> | ■ |   | 3, 14 |
| 96  | <i>Atp6v1f</i>   |                            | <i>hi1988</i> <sup>Dre</sup>             |   | ◇ | 3     |
| 97  | <i>Atp6v1h*</i>  |                            | <i>hi923</i>                             |   |   | 3, 14 |
| 98  | <i>Rpl24</i>     | <i>belly spot and tail</i> |                                          |   |   | 1     |
| 99  | <i>Rps19</i>     | <i>dark skin 3</i>         |                                          |   |   | 1     |
| 100 | <i>Rps20</i>     | <i>dark skin 4</i>         |                                          |   |   | 1     |

**g) xanthophore development** (retention rate: 9/11 = 81.8%)

|     |                  |                           |                                           |   |  |           |
|-----|------------------|---------------------------|-------------------------------------------|---|--|-----------|
| 95  | <i>Atp6v1e1*</i> |                           | <i>hi577a (atp6v1e1a)</i> <sup>Dre</sup>  | ■ |  | 3, 14     |
| 97  | <i>Atp6v1h*</i>  |                           | <i>hi923</i>                              |   |  | 3, 14     |
| 101 | <i>Csf1r</i>     |                           | <i>panther (csf1ra)</i> <sup>Dre</sup>    | ■ |  | 3, 32     |
| 6   | <i>Edn3*</i>     | <i>lethal spotting</i>    |                                           | ■ |  | 1         |
| 7   | <i>Ednrb1*</i>   | <i>piebald spotting</i>   | <i>rose (ednrb1a)</i> <sup>Dre</sup>      | ■ |  | 1, 3, 444 |
| 14  | <i>Foxd3*</i>    |                           | <i>mother superior</i> <sup>Dre</sup>     |   |  | 3, 8      |
| 102 | <i>Ghr</i>       |                           |                                           | ■ |  | 33        |
| 33  | <i>Pax3*</i>     | <i>splotch</i>            |                                           | ■ |  | 1, 13     |
| 103 | <i>Pax7</i>      |                           |                                           | ■ |  | 1, 13     |
| 104 | <i>Smtl</i>      |                           | <i>color interfere</i> <sup>Ola</sup>     | ■ |  | 34        |
| 38  | <i>Sox10*</i>    | <i>Dominant megacolon</i> | <i>colourless (sox10b)</i> <sup>Dre</sup> | ■ |  | 1, 3, 17  |

**h) pteridine synthesis** (FSGD duplicate retention rate: 2/11 = 18.2%)

|     |               |  |                              |   |   |           |
|-----|---------------|--|------------------------------|---|---|-----------|
| 105 | <i>Gch1a</i>  |  |                              |   |   | 35        |
| 106 | <i>Gch1b</i>  |  |                              |   |   | 3, 35, 36 |
| 107 | <i>Gchfr</i>  |  |                              |   |   | 35        |
| 108 | <i>Mycbp2</i> |  | <i>esrom</i> <sup>Dre</sup>  |   |   | 3, 37     |
| 109 | <i>Paics</i>  |  | <i>hi2688</i> <sup>Dre</sup> |   |   | 3         |
| 110 | <i>Pcbd1</i>  |  |                              |   |   | 35        |
| 111 | <i>Pcbd2</i>  |  |                              |   |   | 35        |
| 112 | <i>Pts</i>    |  |                              |   |   | 35        |
| 113 | <i>Qdpr</i>   |  |                              | ■ | ◇ | 35        |
| 114 | <i>Spr</i>    |  |                              | ■ |   | 35        |
| 115 | <i>Xdh</i>    |  |                              |   |   | 3, 35     |

**i) iridophore development** (FSGD duplicate retention rate: 4/11 = 36.4%)

|     |                 |                           |                                           |   |  |           |
|-----|-----------------|---------------------------|-------------------------------------------|---|--|-----------|
| 97  | <i>Atp6v1h*</i> |                           | <i>hi923</i>                              |   |  | 3, 14     |
| 116 | <i>Dac</i>      |                           | <i>hagoromo</i> <sup>Dre</sup>            |   |  | 38        |
| 6   | <i>Edn3*</i>    | <i>lethal spotting</i>    |                                           | ■ |  | 1         |
| 7   | <i>Ednrb1*</i>  | <i>piebald spotting</i>   | <i>rose (ednrb1a)</i> <sup>Dre</sup>      | ■ |  | 1, 3, 4   |
| 14  | <i>Foxd3*</i>   |                           | <i>mother superior</i> <sup>Dre</sup>     |   |  | 3, 8      |
| 117 | <i>Ltk</i>      |                           | <i>shady</i> <sup>Dre</sup>               |   |  | 39        |
| 37  | <i>Sox9*</i>    |                           | <i>b971 (sox9b)</i> <sup>Dre</sup>        | ■ |  | 3, 15, 16 |
| 38  | <i>Sox10*</i>   | <i>Dominant megacolon</i> | <i>colourless (sox10b)</i> <sup>Dre</sup> | ■ |  | 1, 3, 17  |
| 118 | <i>Trim33</i>   |                           | <i>moonshine</i> <sup>Dre</sup>           |   |  | 3         |
| 76  | <i>Vps18*</i>   |                           | <i>vps18</i> <sup>Dre</sup>               |   |  | 3, 29     |
| 77  | <i>Vps39*</i>   |                           | <i>lbk/vam6</i> <sup>Dre</sup>            |   |  | 3, 30     |

**j) uncategorized function** (FSGD duplicate retention rate: 3/10 = 30.0%)

|     |                 |  |                                         |   |   |       |
|-----|-----------------|--|-----------------------------------------|---|---|-------|
| 119 | <i>Abhd11</i>   |  | <i>hi3305</i> <sup>Dre</sup>            |   |   | 3     |
| 120 | <i>Atoh7</i>    |  | <i>lakritz</i> <sup>Dre</sup>           |   |   | 3, 40 |
| 121 | <i>Ebna1bp2</i> |  | <i>hi3625a</i> <sup>Dre</sup>           |   |   | 3     |
| 122 | <i>Gfpt1</i>    |  | <i>eartha</i> <sup>Dre</sup>            |   |   | 3     |
| 123 | <i>Gja5</i>     |  | <i>leopard</i> <sup>Dre</sup>           | ■ |   | 3, 41 |
| 124 | <i>Irf4</i>     |  |                                         | ■ | ◇ | 42    |
| 125 | <i>Kcnj13</i>   |  | <i>jaguar</i> <sup>Dre</sup>            |   |   | 3, 43 |
| 126 | <i>Pabpc1</i>   |  | <i>hi3202b (pabpc1a)</i> <sup>Dre</sup> | ■ |   | 3     |
| 127 | <i>Skiv2l2</i>  |  | <i>julie</i> <sup>Dre</sup>             |   |   | 3     |
| 128 | <i>Tpcn2</i>    |  |                                         |   |   | 44    |

\* gene belongs to more than one category

<sup>Dre</sup> *Danio rerio* (zebrafish); <sup>Ola</sup> *Oryzias latipes* (medaka)

<sup>1</sup> ■ indicates that a FSGD duplicate has been retained in teleosts

<sup>2</sup> ◇ indicates that a lineage-specific gene duplication (LSGD) has occurred in one or more teleosts

## Literature Cited

- 1) Mouse Coat Color Genes (<http://www.espcr.org/micemut/>).
- 2) Lin, J.Y. and D.E. Fisher. 2007. Melanocyte biology and skin pigmentation. *Nature* **445**: 843-850.
- 3) Zebrafish Model Organism Database (ZFIN; <http://zfin.org>).
- 4) Parichy, D.M., E.M. Mellgren, J.F. Rawls, S.S. Lopes, R.N. Kelsh, and S.L. Johnson. 2000. Mutational analysis of endothelin receptor b1 (rose) during neural crest and pigment pattern development in the zebrafish *Danio rerio*. *Dev Biol* **227**: 294-306.
- 5) Miwa, M., M. Inoue-Murayama, H. Aoki, T. Kunisada, T. Hiragaki, M. Mizutani, and S. Ito. 2007. Endothelin receptor B2 (EDNRB2) is associated with the panda plumage colour mutation in Japanese quail. *Anim Genet* **38**: 103-108.
- 6) Meierjohann, S. and M. Schartl. 2006. From Mendelian to molecular genetics: the *Xiphophorus* melanoma model. *Trends Genet* **22**: 654-661.
- 7) Budi, E.H., L.B. Patterson, and D.M. Parichy. 2008. Embryonic requirements for ErbB signaling in neural crest development and adult pigment pattern formation. *Development* **135**: 2603-2614.
- 8) Montero-Balaguer, M., M.R. Lang, S.W. Sachdev, C. Knappmeyer, R.A. Stewart, A. De La Guardia, A.K. Hatzopoulos, and E.W. Knapik. 2006. The mother superior mutation ablates *foxd3* activity in neural crest progenitor cells and depletes neural crest derivatives in zebrafish. *Dev Dyn* **235**: 3199-3212.
- 9) Ignatius, M.S., H.E. Moose, H.M. El-Hodiri, and P.D. Henion. 2008. *colgate/hdac1* Repression of *foxd3* expression is required to permit *mitfa*-dependent melanogenesis. *Dev Biol* **313**: 568-583.
- 10) Parichy, D.M., J.F. Rawls, S.J. Pratt, T.T. Whitfield, and S.L. Johnson. 1999. Zebrafish *sparse* corresponds to an orthologue of *c-kit* and is required for the morphogenesis of a subpopulation of melanocytes, but is not essential for hematopoiesis or primordial germ cell development. *Development* **126**: 3425-3436.
- 11) Hultman, K.A., N. Bahary, L.I. Zon, and S.L. Johnson. 2007. Gene Duplication of the zebrafish *kit* ligand and partitioning of melanocyte development functions to *kit* ligand a. *PLoS Genet* **3**: e17.
- 12) Lister, J.A., C.P. Robertson, T. Lepage, S.L. Johnson, and D.W. Raible. 1999. *nacre* encodes a zebrafish microphthalmia-related protein that regulates neural-crest-derived pigment cell fate. *Development* **126**: 3757-3767.
- 13) Minchin, J.E. and S.M. Hughes. 2008. Sequential actions of *Pax3* and *Pax7* drive xanthophore development in zebrafish neural crest. *Dev Biol* **317**: 508-522.
- 14) Pickart, M.A., S. Sivasubbu, A.L. Nielsen, S. Shriram, R.A. King, and S.C. Ekker. 2004. Functional genomics tools for the analysis of zebrafish pigment. *Pigment Cell Res* **17**: 461-470.
- 15) Passeron, T., J.C. Valencia, C. Bertolotto, T. Hoashi, E. Le Pape, K. Takahashi, R. Ballotti, and V.J. Hearing. 2007. *SOX9* is a key player in ultraviolet B-induced melanocyte differentiation and pigmentation. *Proc Natl Acad Sci U S A* **104**: 13984-13989.

- 16) Yan, Y.L., J. Willoughby, D. Liu, J.G. Crump, C. Wilson, C.T. Miller, A. Singer, C. Kimmel, M. Westerfield, and J.H. Postlethwait. 2005. A pair of Sox: distinct and overlapping functions of zebrafish sox9 co-orthologs in craniofacial and pectoral fin development. *Development* **132**: 1069-1083.
- 17) Dutton, K.A., A. Pauliny, S.S. Lopes, S. Elworthy, T.J. Carney, J. Rauch, R. Geisler, P. Haffter, and R.N. Kelsh. 2001. Zebrafish colourless encodes sox10 and specifies non-ectomesenchymal neural crest fates. *Development* **128**: 4113-4125.
- 18) Knight, R.D., S. Nair, S.S. Nelson, A. Afshar, Y. Javidan, R. Geisler, G.J. Rauch, and T.F. Schilling. 2003. lockjaw encodes a zebrafish tfap2a required for early neural crest development. *Development* **130**: 5755-5768.
- 19) McNeill, M.S., J. Paulsen, G. Bonde, E. Burnight, M.Y. Hsu, and R.A. Cornell. 2007. Cell death of melanophores in zebrafish trpm7 mutant embryos depends on melanin synthesis. *J Invest Dermatol* **127**: 2020-2030.
- 20) Wasmeier, C., M. Romao, L. Plowright, D.C. Bennett, G. Raposo, and M.C. Seabra. 2006. Rab38 and Rab32 control post-Golgi trafficking of melanogenic enzymes. *J Cell Biol* **175**: 271-281.
- 21) Schonhaler, H.B., J.M. Lampert, J. von Lintig, H. Schwarz, R. Geisler, and S.C. Neuhaus. 2005. A mutation in the silver gene leads to defects in melanosome biogenesis and alterations in the visual system in the zebrafish mutant fading vision. *Dev Biol* **284**: 421-436.
- 22) Sulem, P., D.F. Gudbjartsson, S.N. Stacey, A. Helgason, T. Rafnar, K.P. Magnusson, A. Manolescu, A. Karason, A. Palsson, G. Thorleifsson, M. Jakobsdottir, S. Steinberg, S. Palsson, F. Jonasson, B. Sigurgeirsson, K. Thorisdottir, R. Ragnarsson, K.R. Benediksdottir, K.K. Aben, L.A. Kiemenev, J.H. Olafsson, J. Gulcher, A. Kong, U. Thorsteinsdottir, and K. Stefansson. 2007. Genetic determinants of hair, eye and skin pigmentation in Europeans. *Nat Genet* **39**: 1443-1452.
- 23) Lamason, R.L., M.A. Mohideen, J.R. Mest, A.C. Wong, H.L. Norton, M.C. Aros, M.J. Juryneec, X. Mao, V.R. Humphreville, J.E. Humbert, S. Sinha, J.L. Moore, P. Jagadeeswaran, W. Zhao, G. Ning, I. Makalowska, P.M. McKeigue, D. O'Donnell, R. Kittles, E.J. Parra, N.J. Mangini, D.J. Grunwald, M.D. Shriver, V.A. Canfield, and K.C. Cheng. 2005. SLC24A5, a putative cation exchanger, affects pigmentation in zebrafish and humans. *Science* **310**: 1782-1786.
- 24) Fukamachi, S., A. Shimada, and A. Shima. 2001. Mutations in the gene encoding B, a novel transporter protein, reduce melanin content in medaka. *Nat Genet* **28**: 381-385.
- 25) Koga, A., H. Inagaki, Y. Bessho, and H. Hori. 1995. Insertion of a novel transposable element in the tyrosinase gene is responsible for an albino mutation in the medaka fish, *Oryzias latipes*. *Mol Gen Genet* **249**: 400-405.
- 26) Page-McCaw, P.S., S.C. Chung, A. Muto, T. Roeser, W. Staub, K.C. Finger-Baier, J.I. Korenbrot, and H. Baier. 2004. Retinal network adaptation to bright light requires tyrosinase. *Nat Neurosci* **7**: 1329-1336.
- 27) Fukamachi, S., S. Asakawa, Y. Wakamatsu, N. Shimizu, H. Mitani, and A. Shima. 2004. Conserved function of medaka pink-eyed dilution in melanin synthesis and its divergent transcriptional regulation in gonads among vertebrates. *Genetics* **168**: 1519-1527.
- 28) Yu, J.F., S. Fukamachi, H. Mitani, H. Hori, and A. Kanamori. 2006. Reduced expression of vps11 causes less pigmentation in medaka, *Oryzias latipes*. *Pigment Cell Res* **19**: 628-634.
- 29) Maldonado, E., F. Hernandez, C. Lozano, M.E. Castro, and R.E. Navarro. 2006. The zebrafish mutant vps18 as a model for vesicle-traffic related hypopigmentation diseases. *Pigment Cell Res* **19**: 315-326.

- 30) Schonthaler, H.B., V.C. Fleisch, O. Biehlmaier, Y. Makhankov, O. Rinner, R. Bahadori, R. Geisler, H. Schwarz, S.C. Neuhauss, and R. Dahm. 2008. The zebrafish mutant *lbk/vam6* resembles human multisystemic disorders caused by aberrant trafficking of endosomal vesicles. *Development* **135**: 387-399.
- 31) Sheets, L., D.G. Ransom, E.M. Mellgren, S.L. Johnson, and B.J. Schnapp. 2007. Zebrafish melanophilin facilitates melanosome dispersion by regulating dynein. *Curr Biol* **17**: 1721-1734.
- 32) Parichy, D.M., D.G. Ransom, B. Paw, L.I. Zon, and S.L. Johnson. 2000. An orthologue of the kit-related gene *fms* is required for development of neural crest-derived xanthophores and a subpopulation of adult melanocytes in the zebrafish, *Danio rerio*. *Development* **127**: 3031-3044.
- 33) Fukamachi, S. and A. Meyer. 2007. Evolution of receptors for growth hormone and somatotactin in fish and land vertebrates: lessons from the lungfish and sturgeon orthologues. *J Mol Evol* **65**: 359-372.
- 34) Fukamachi, S., M. Sugimoto, H. Mitani, and A. Shima. 2004b. Somatotactin selectively regulates proliferation and morphogenesis of neural-crest derived pigment cells in medaka. *Proc Natl Acad Sci U S A* **101**: 10661-10666.
- 35) Braasch, I., M. Scharl, and J.N. Volff. 2007. Evolution of pigment synthesis pathways by gene and genome duplication in fish. *BMC Evol Biol* **7**: 74.
- 36) Pelletier, I., L. Bally-Cuif, and I. Ziegler. 2001. Cloning and developmental expression of zebrafish GTP cyclohydrolase I. *Mech Dev* **109**: 99-103.
- 37) Le Guyader, S., J. Maier, and S. Jesuthasan. 2005. Esrom, an ortholog of PAM (protein associated with c-myc), regulates pteridine synthesis in the zebrafish. *Dev Biol* **277**: 378-386.
- 38) Kawakami, K., A. Amsterdam, N. Shimoda, T. Becker, J. Mugg, A. Shima, and N. Hopkins. 2000. Proviral insertions in the zebrafish *hagoromo* gene, encoding an F-box/WD40-repeat protein, cause stripe pattern anomalies. *Curr Biol* **10**: 463-466.
- 39) Lopes, S.S., X. Yang, J. Muller, T.J. Carney, A.R. McAdow, G.J. Rauch, A.S. Jacoby, L.D. Hurst, M. Delfino-Machin, P. Haffter, R. Geisler, S.L. Johnson, A. Ward, and R.N. Kelsh. 2008. Leukocyte tyrosine kinase functions in pigment cell development. *PLoS Genet* **4**: e1000026.
- 40) Kelsh, R.N., M. Brand, Y.J. Jiang, C.P. Heisenberg, S. Lin, P. Haffter, J. Odenthal, M.C. Mullins, F.J. van Eeden, M. Furutani-Seiki, M. Granato, M. Hammerschmidt, D.A. Kane, R.M. Warga, D. Beuchle, L. Vogelsang, and C. Nusslein-Volhard. 1996. Zebrafish pigmentation mutations and the processes of neural crest development. *Development* **123**: 369-389.
- 41) Watanabe, M., M. Iwashita, M. Ishii, Y. Kurachi, A. Kawakami, S. Kondo, and N. Okada. 2006. Spot pattern of leopard *Danio* is caused by mutation in the zebrafish *connexin41.8* gene. *EMBO Rep* **7**: 893-897.
- 42) Han, J., P. Kraft, H. Nan, Q. Guo, C. Chen, A. Qureshi, S.E. Hankinson, F.B. Hu, D.L. Duffy, Z.Z. Zhao, N.G. Martin, G.W. Montgomery, N.K. Hayward, G. Thomas, R.N. Hoover, S. Chanock, and D.J. Hunter. 2008. A genome-wide association study identifies novel alleles associated with hair color and skin pigmentation. *PLoS Genet* **4**: e1000074.
- 43) Iwashita, M., M. Watanabe, M. Ishii, T. Chen, S.L. Johnson, Y. Kurachi, N. Okada, and S. Kondo. 2006. Pigment pattern in jaguar/obelix zebrafish is caused by a *Kir7.1* mutation: implications for the regulation of melanosome movement. *PLoS Genet* **2**: e197.
- 44) Sulem, P., D.F. Gudbjartsson, S.N. Stacey, A. Helgason, T. Rafnar, M. Jakobsdottir, S. Steinberg, S.A. Gudjonsson, A. Palsson, G. Thorleifsson, S. Palsson, B. Sigurgeirsson, K. Thorisdottir, R. Ragnarsson,

K.R. Benediksdottir, K.K. Aben, S.H. Vermeulen, A.M. Goldstein, M.A. Tucker, L.A. Kiemeny, J.H. Olafsson, J. Gulcher, A. Kong, U. Thorsteinsdottir, and K. Stefansson. 2008. Two newly identified genetic determinants of pigmentation in Europeans. *Nat Genet* **40**: 835-837.
